# Supplementary material for: Synthesis and characterization of RGO/zeolite composites for the removal of arsenic from contaminated water
Source: Royal Society of Chemistry journal article supplement (doi:10.1039/c5ra02949j), 2015-01-01
Supplement: c5ra02949j1.pdf [file c5ra02949j1.pdf]

## Supplementary information

Synthesis and characterization of RGO/zeolite composites for removal of arsenic  
from contaminated water

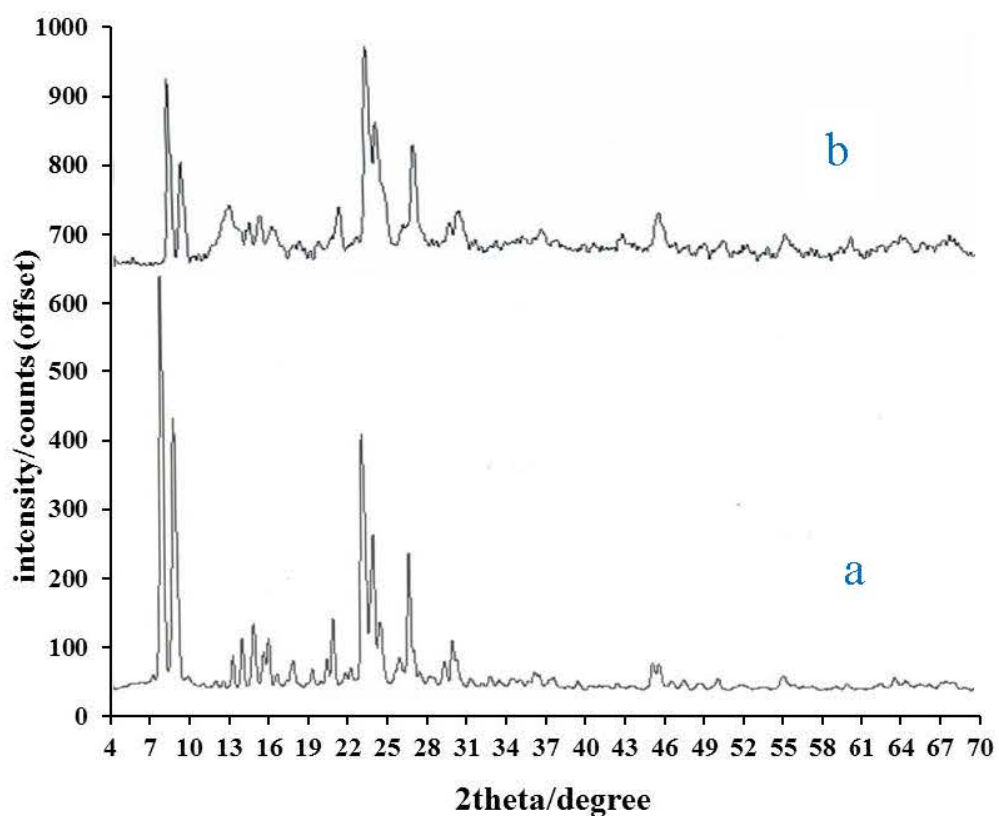

Figure. 1s. XRD pattern of Cu-Clin (a), RGO/Cu-Clin (b).

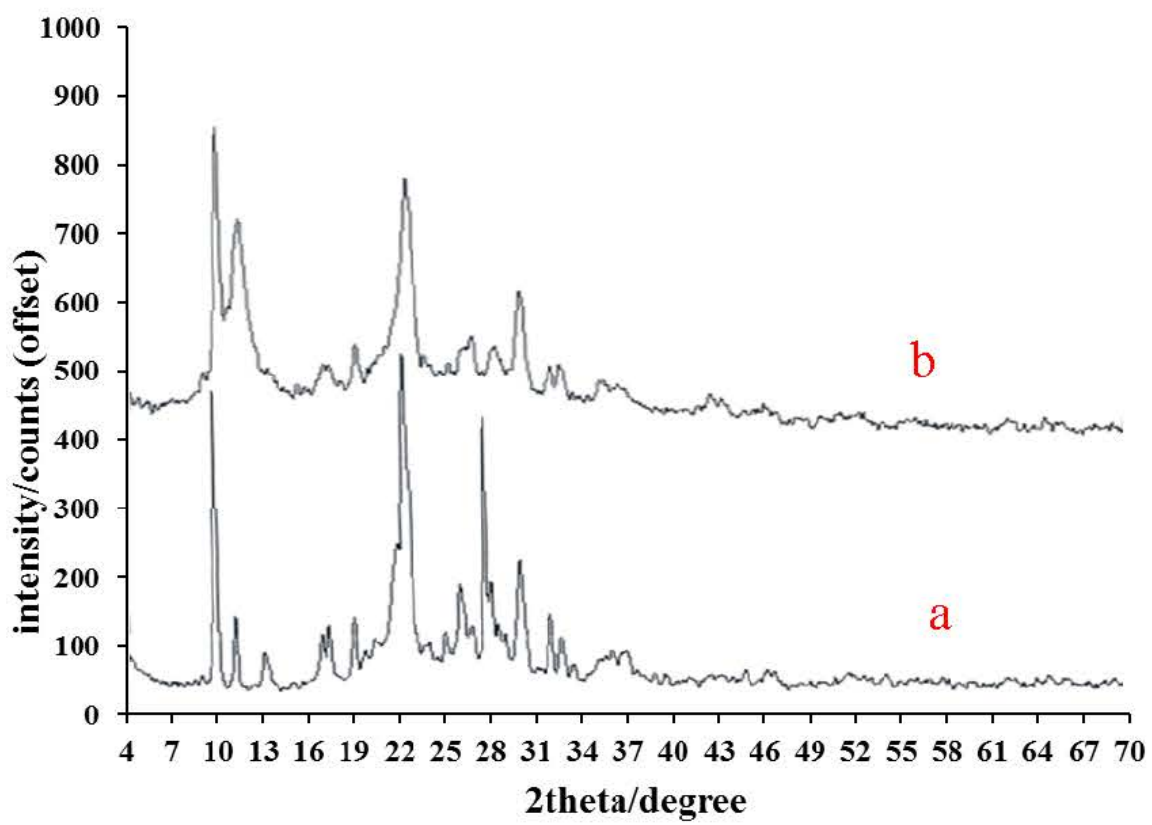

Figure. 2s. XRD pattern of Cu-ZSM-5 (a), RGO/Cu-ZSM-5 (b).
